# Supplementary material for: Knowledge and Attitude of Iranian University Students toward Genital Warts
Source: Hindawi journal article supplement (doi:10.1155/2022/6730476), 2022-07-13
Supplement: f1 [file 6730476.f1.pdf]

1. Demographic data

- Age
- Gender
- Education level
- Study field
- Marital status
- Number of children

2. General knowledge about HPV

- Have you ever heard about HPV?
- Is it the causal agent for genital wart?
- Is it a STD?
- Is it the causal agent of cervical cancer?
- Can it be asymptomatic?
- Can it be diagnosable with pop smear?
- Is it curable?
- Is it need to be treated immediately?
- Is it treatable with antibiotics?
- Is it detected in 90% of patients with cervical cancer?
- 

3. Which of following items are considered as genital wart risk factors:

- Smoking
- UV
- OCP
- Multi partnership
- Alcohol
- Intercourse in lower age
- Diet
- Genetic
- Marital status

4. Which of following factors are considered as transmission path or predisposing factor?

- Kissing
- Intercourse
- Oral sex
- Contact with warts on other areas of body
- Shared toilet
- Body fluids (semen, blood)
- Shared underwear
- Skin to skin contact in genital area

5. Others

- can AIDS be caused from HPV?
- Can genital herpes be caused from HPV?

- Can HPV cause serious health issues in men?
- Can HPV cause serious health issues in women?
- Can HPV infection be prevented by using condom?
- Can HPV cause infertility?
  
- Do you know about the fact that about half of sexually active adults are HPV-infected?

6. Students' attitude towards HPV-infected ones:

- Their freedom should be limited
- They should be embarrassed
- They can take care of children without any risk
- I do not scare from meeting this people
- They are dirty
- I do not want to be friend of such people
- They should be isolated in the society
